# Supplementary material for: Characterization of the Altered Gene Expression Profile in Early Porcine Embryos Generated from Parthenogenesis and Somatic Cell Chromatin Transfer
Source: PLoS One. 2014 Mar 14;9(3):e91728. doi: 10.1371/journal.pone.0091728 (PMC3954727; doi:10.1371/journal.pone.0091728)
Supplement: Dataset S5 — Expression data of genes that differentially expressed (FC > 2 or <0.5, B-H P-value<0.05) during the blastocyst hatching process in PA and IVV-derived embryos. (XLSX) [file pone.0091728.s005.xlsx]

## Sheet: Dataset S5
Microarray analysis PA HB vs. PA XB			Microarray analysis IVV HB vs. IVV XB
[PA HB vs. PA XB] unique differentially expressed genes	log2(Fold change) [PA HB vs. PA XB]	BH-FDR p-value [PA HB vs. PA XB]	[IVV HB vs. IVV XB] unique differentially expressed genes	log2(Fold change) [IVV HB vs. IVV XB]	BH-FDR p-value [IVV HB vs. IVV XB]
ANXA8	3.25434	0.000758126
KCTD3	1.61594	0.0421429
SLC36A2	3.28538	0.00135039
			SEPT7	-1.22083	0.0403584
			ABCG2	1.56581	0.0403584
			ACP6	1.35488	0.0403584
			AGXT2L1	-1.81201	0.0332334
			APOE	1.46439	0.00434532
			ATP5G1	1.37573	0.0332334
			ATP6V0D2	-2.08911	0.00716805
			B4GALT5	1.84889	0.0243735
			CA2	-2.15584	0.0403584
			CLDN4	-1.55625	0.00671717
			DPP4	3.08684	0.00434532
			EEF1A2	-2.84836	0.000586896
			GAPDH	1.46963	0.0403584
			GNPDA1	1.75551	0.0153352
			HSP90AA1	1.46754	0.0403584
			IL6	-3.1307	4.82876e-05
			LGMN	1.30241	0.0482073
			LOC100511328	-2.5966	0.00434532
			MAP1LC3B	-1.65722	0.00781571
			MKNK1	2.13662	0.0332334
			NPC1	2.00861	0.0358938
			PAQR8	2.18758	0.00860613
			PCYOX1	-1.45809	0.0403584
			PQLC3	1.30375	0.0475625
			SFT2D2	-1.46561	0.0403584
			SLC41A1	-2.07312	0.0403584
			SPIC	-1.49633	0.0482073
			SPTSSA	-2.0481	0.0403584
			SRP14	-1.84081	0.00832984
			STOM	-1.67037	0.0403584
			STS	1.17313	0.0316274
